# Supplementary material
Source: Research Square preprint supplement (doi:10.21203/rs.3.rs-5893753/v2)
Supplement: Supplementary file 1 [file 3889f339d5830a326ea01249.xlsx]

## Sheet: Hoja1
Gene/Transcript	Aplication	Sequence	Amplicon distance to TSS	Reference
FLC	ChIP	ACTCGGAGTGGGTGAAACTG	-1154	Yang et al. (2016) DOI 10.1073/pnas.1605733113
FLC	ChIP	CAAAACTTCTTGGCACAGCTC
FLC	ChIP	TGCAGAAAGAACCTCCACTCTAC	-335	Yang et al. (2016) DOI 10.1073/pnas.1605733113
FLC	ChIP	TGCAGAAAGAACCTCCACTCTAC
FLC	ChIP	GCCCGACGAAGAAAAAGTAG	-1	Yang et al. (2016) DOI 10.1073/pnas.1605733113
FLC	ChIP	TCCTCAGGTTTGGGTTCAAG
FLC	ChIP	CGACAAGTCACCTTCTCCAAA	232.5	Yang et al. (2016) DOI 10.1073/pnas.1605733113
FLC	ChIP	AGGGGGAACAAATGAAAACC
FLC	ChIP	GGCGGATCTCTTGTTGTTTC	456	Yang et al. (2016) DOI 10.1073/pnas.1605733113
FLC	ChIP	CTTCTTCACGACATTGTTCTTCC
FLC	ChIP	TCATTGGATCTCTCGGATTTG	854	Yang et al. (2016) DOI 10.1073/pnas.1605733113
FLC	ChIP	AGGTCCACAGCAAAGATAGGAA
FLC	ChIP	TTGACAATCCACAACCTCAATC	1598.5	Yang et al. (2016) DOI 10.1073/pnas.1605733113
FLC	ChIP	TCAATTTCCTAGAGGCACCAA
FLC	ChIP	GGGGCTGCGTTTACATTTTA	3262	Yang et al. (2016) DOI 10.1073/pnas.1605733113
FLC	ChIP	GTGATAGCGCTGGCTTTGAT
FLC	ChIP	CTTTTTCATGGGCAGGATCA	4090	Yang et al. (2016) DOI 10.1073/pnas.1605733113
FLC	ChIP	TGACATTTGATCCCACAAGC
FLC	ChIP	CCGGTTGTTGGACATAACTAGG	5188.5	Yang et al. (2016) DOI 10.1073/pnas.1605733113
FLC	ChIP	CCAAACCCAGACTTAACCAGAC
FLC	ChIP	TGGTTGTTATTTGGTGGTGTG	5697.5	Yang et al. (2016) DOI 10.1073/pnas.1605733113
FLC	ChIP	ATCTCCATCTCAGCTTCTGCTC
FLC	ChIP	TTGTAAAGTCCGATGGAGACG	6909	Yang et al. (2016) DOI 10.1073/pnas.1605733113
FLC	ChIP	ACTCGGCGAGAAAGTTTGTG
FLM	ChIP	CCAATTTCCAACCTAATGCTTGATAAA	-1490	Zhao et al. (2022) DOI 10.1111/nph.17836
FLM	ChIP	TTCAGATGGTATAGTTGCACACAAG
FLM	ChIP	GTCGTGGGCTGATTCTGGTTCACC	-717	Kim and Sung (2013) DOI 10.1105/tpc.112.104760
FLM	ChIP	CCATTACTTTATCGAGTTAGGTCGTAGGTTCT
FLM	ChIP	CGAGATCAAGCGAATCGAGAACA	303	Zhao et al. (2022) DOI 10.1111/nph.17836
FLM	ChIP	TGATTTGATGGAATCAAAAAGCCCT
FLM	ChIP	GATGGTTTATTGTAGTGCTGGGAT	1121.5	Zhao et al. (2022) DOI 10.1111/nph.17836
FLM	ChIP	GAACCTACTAGGCCACTGACATAT
FLM	ChIP	TAGAGCTGTCATGACCTTCCCG	2129	Zhao et al. (2022) DOI 10.1111/nph.17836
FLM	ChIP	AACTCATCCCCATGAGTTCGAT
FLM	ChIP	CCGTAAGTAGAGCTAGGAAGGTATATGTGCTGC	3360.5	Kim and Sung (2013) DOI 10.1105/tpc.112.104760
FLM	ChIP	GACTCGATATACTCCATCATCAGTTCTGCCTATAAC
FLC	RT-qPCR	AGCCAAGAAGACCGAACTCA		Crevilen et al. (2013) DOI 10.1038/emboj.2012.324
FLC	RT-qPCR	TTTGTCCAGCAGGTGACATC
UBC21	RT-qPCR	CTGCGACTCAGGGAATCTTCTAA		Crevilen et al. (2013) DOI 10.1038/emboj.2012.324
UBC21		TTGTGCCATTGAATTGAACCC
FLM-β	RT-qPCR	CTTAGAGCCTTAGATCTTGAAG		Capovilla et al. (2017) 10.1093/jxb/erx328
FLM-β	RT-qPCR	CTTCAAGCTTGCTTTGGACTG
FLM-δ	RT-qPCR	GATAGAAGCGCTGTTCAAGC		Capovilla et al. (2017) 10.1093/jxb/erx328
FLM-δ	RT-qPCR	CAGCAACGTATTCTTTCCCAT
