# Supplementary material
Source: Research Square preprint supplement (doi:10.21203/rs.3.rs-5893753/v2)
Supplement: Supplementary file 2 [file d5d96bc801392e6037a97cb0.docx]

**Supplementary Table S2.** Alignment and Gene Count Statistics for RNA-Seq Samples*.*

| **Sample ID** | **Total Reads a** | **Uniquely Mapped Reads (%) b** | **Multi-Mapping Reads (%) c** | **Unmapped Reads (%) d** | **Gene Counts (HTSeq) e** | **Overlapping genes (%) f** |
| --- | --- | --- | --- | --- | --- | --- |
| COL1 | 21617723 | 94.86 | 4.65 | 0.48 | 22942 | 91.36 |
| COL2 | 19541120 | 95.16 | 4.36 | 0.48 | 22850 | 91.66 |
| COL4 | 25437495 | 95.58 | 4.01 | 0.41 | 23066 | 92.16 |
| E1 | 23973081 | 95.89 | 3.70 | 0.41 | 23116 | 92.40 |
| E2 | 24271027 | 94.75 | 4.82 | 0.43 | 23134 | 90.97 |
| E3 | 24875281 | 94.47 | 5.12 | 0.41 | 23136 | 90.96 |
| EJ1 | 21314471 | 94.93 | 4.40 | 0.67 | 23165 | 91.47 |
| EJ2 | 19859406 | 95.04 | 4.26 | 0.71 | 23185 | 91.47 |
| EJ3 | 19910923 | 95.38 | 3.84 | 0.78 | 23111 | 91.91 |
| J1 | 21983606 | 95.14 | 4.09 | 0.77 | 22973 | 91.65 |
| J2 | 21945065 | 94.94 | 4.29 | 0.77 | 22940 | 91.47 |
| J3 | 21992200 | 95.33 | 4.03 | 0.64 | 22993 | 91.83 |

a Total number of sequencing reads generated for each sample.

b Percentage of reads that mapped uniquely to the reference genome.

c Percentage of reads that mapped to multiple locations in the genome.

d Percentage of reads that failed to align to the reference genome.

e Number of genes with non-zero counts based on HTSeq2.

f Proportion of reads that map to overlapping genes relative to the total number of reads
